# Supplementary material for: Transposable elements reveal a stem cell-specific class of long noncoding RNAs
Source: Springer Nature journal article supplement (doi:10.1186/gb-2012-13-11-r107), 2012-11-26

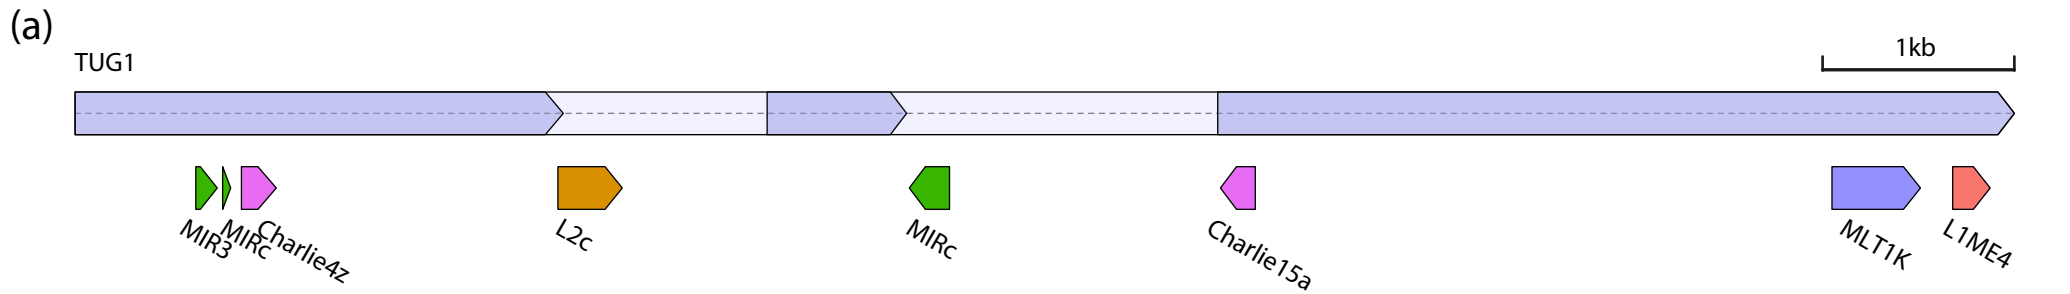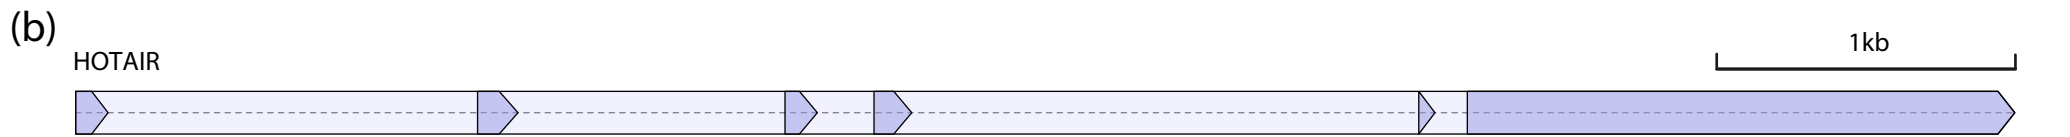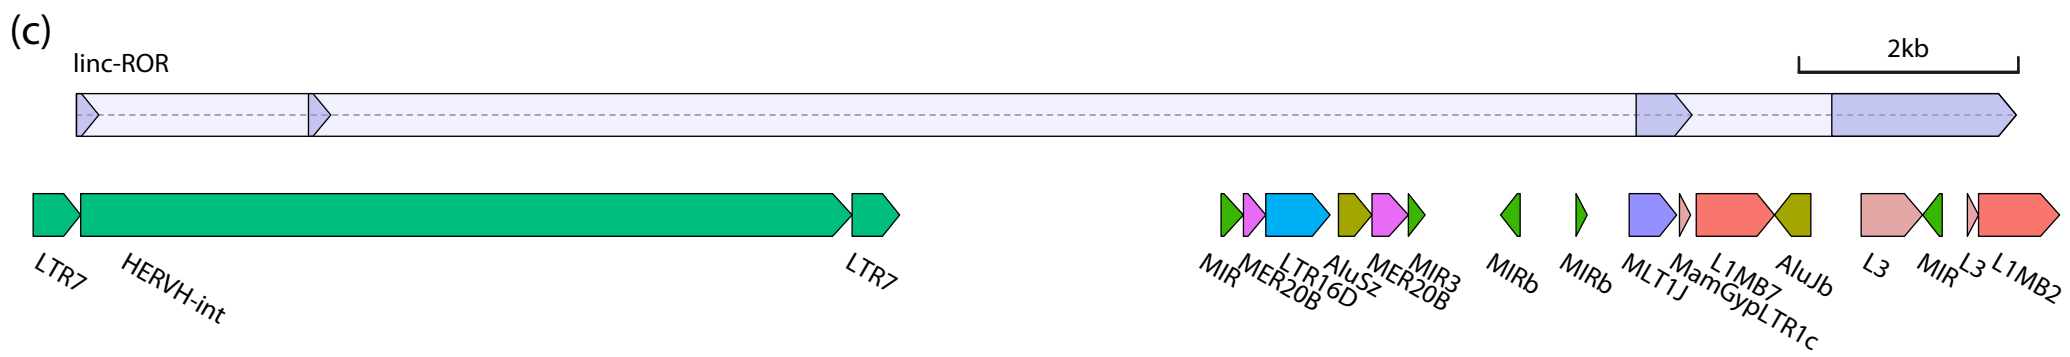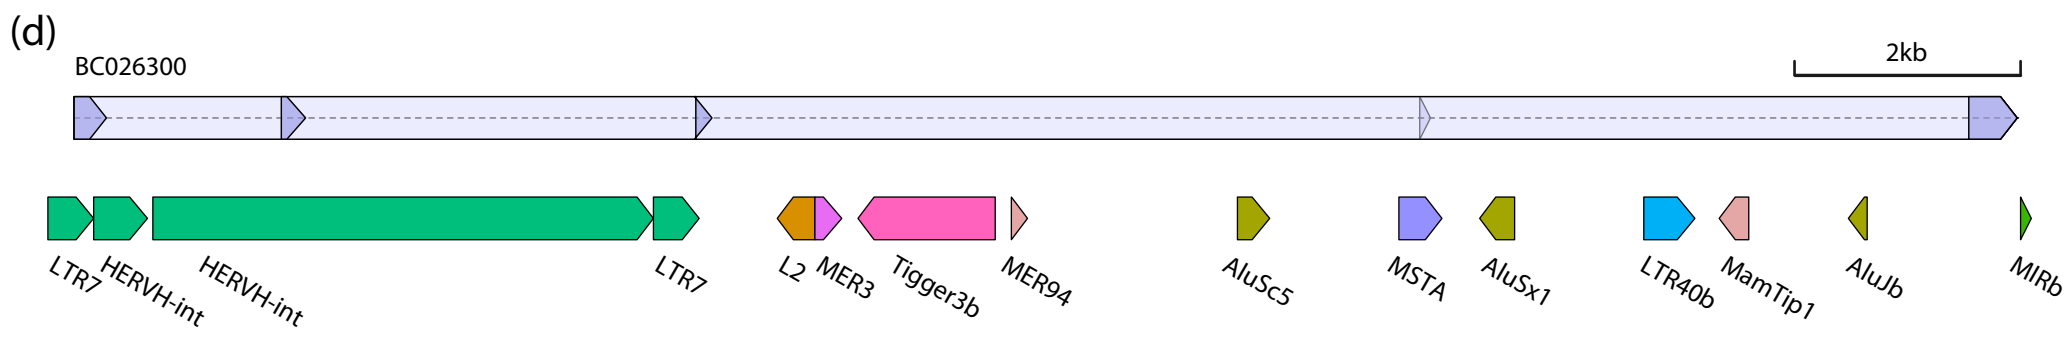

Supplement: 13059_2012_3000_MOESM11_ESM.pdf [file 13059_2012_3000_MOESM11_ESM.pdf]
