# Supplementary material for: Transposable elements reveal a stem cell-specific class of long noncoding RNAs
Source: Springer Nature journal article supplement (doi:10.1186/gb-2012-13-11-r107), 2012-11-26

(a)

## HERV-H

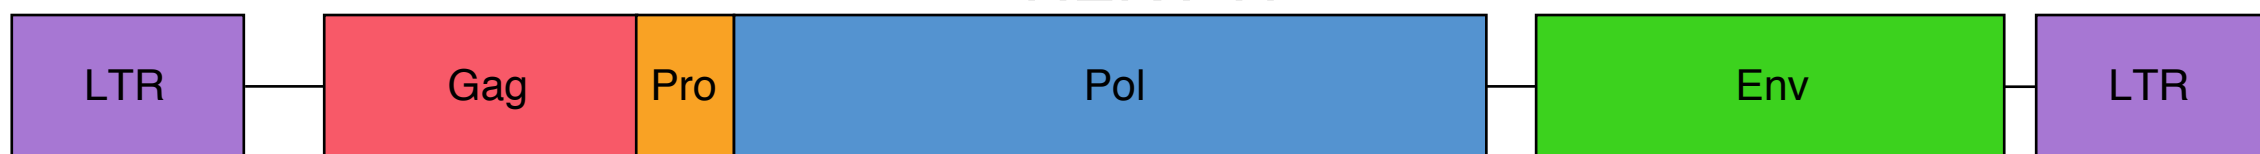

(b)

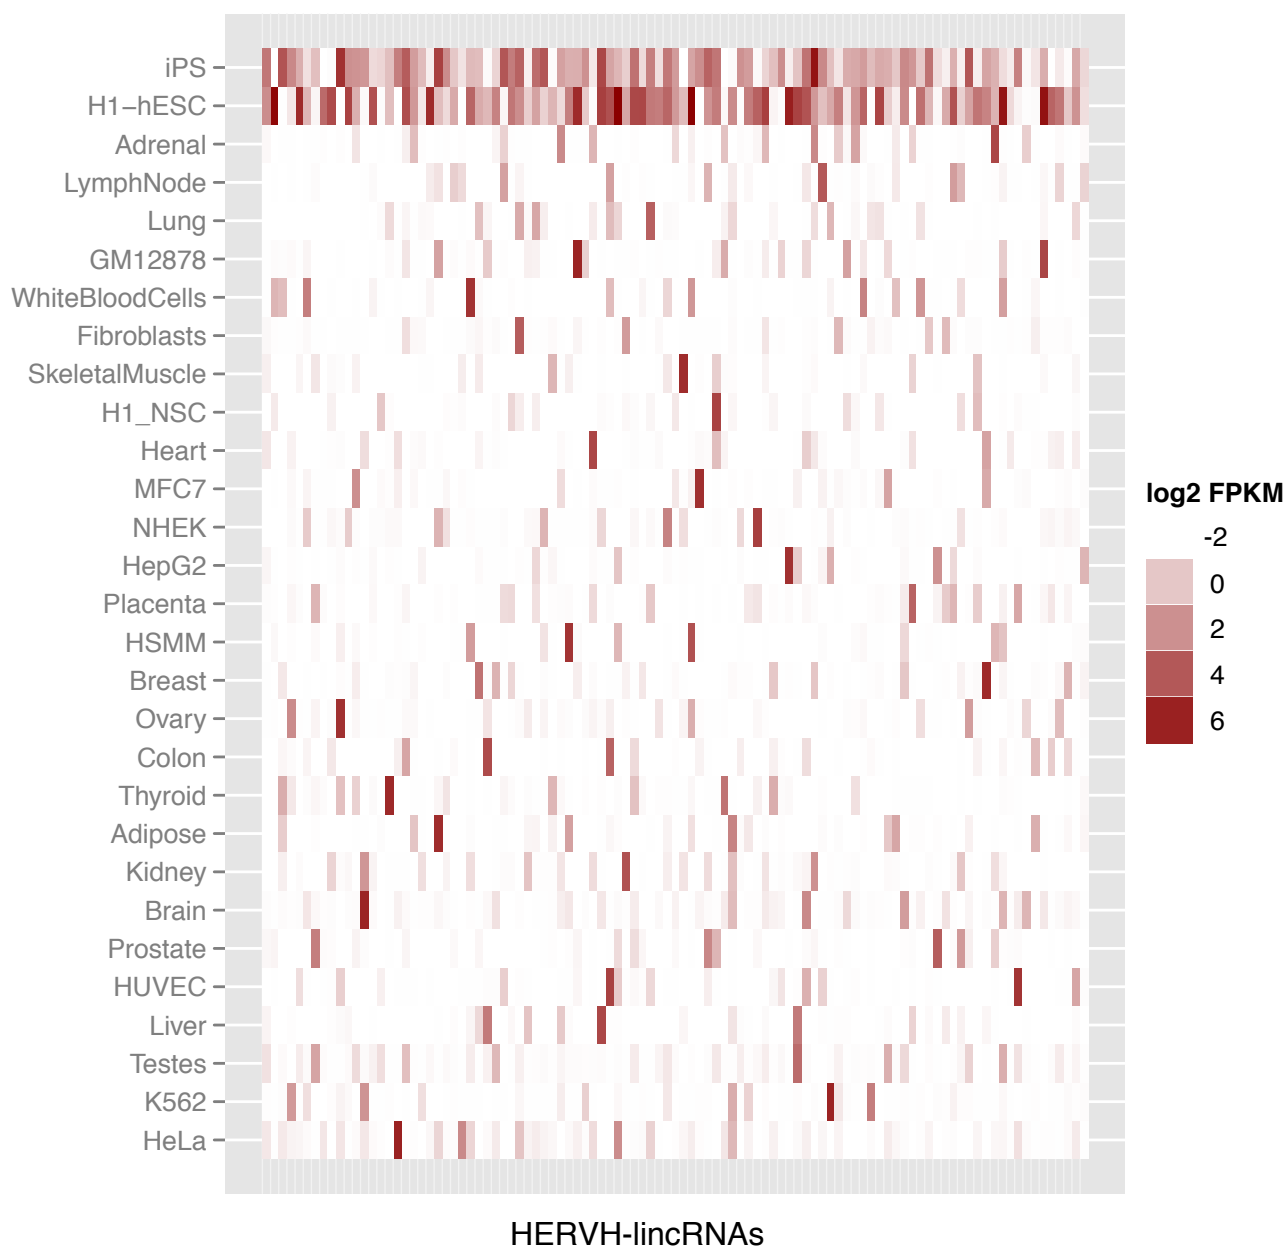

(c)

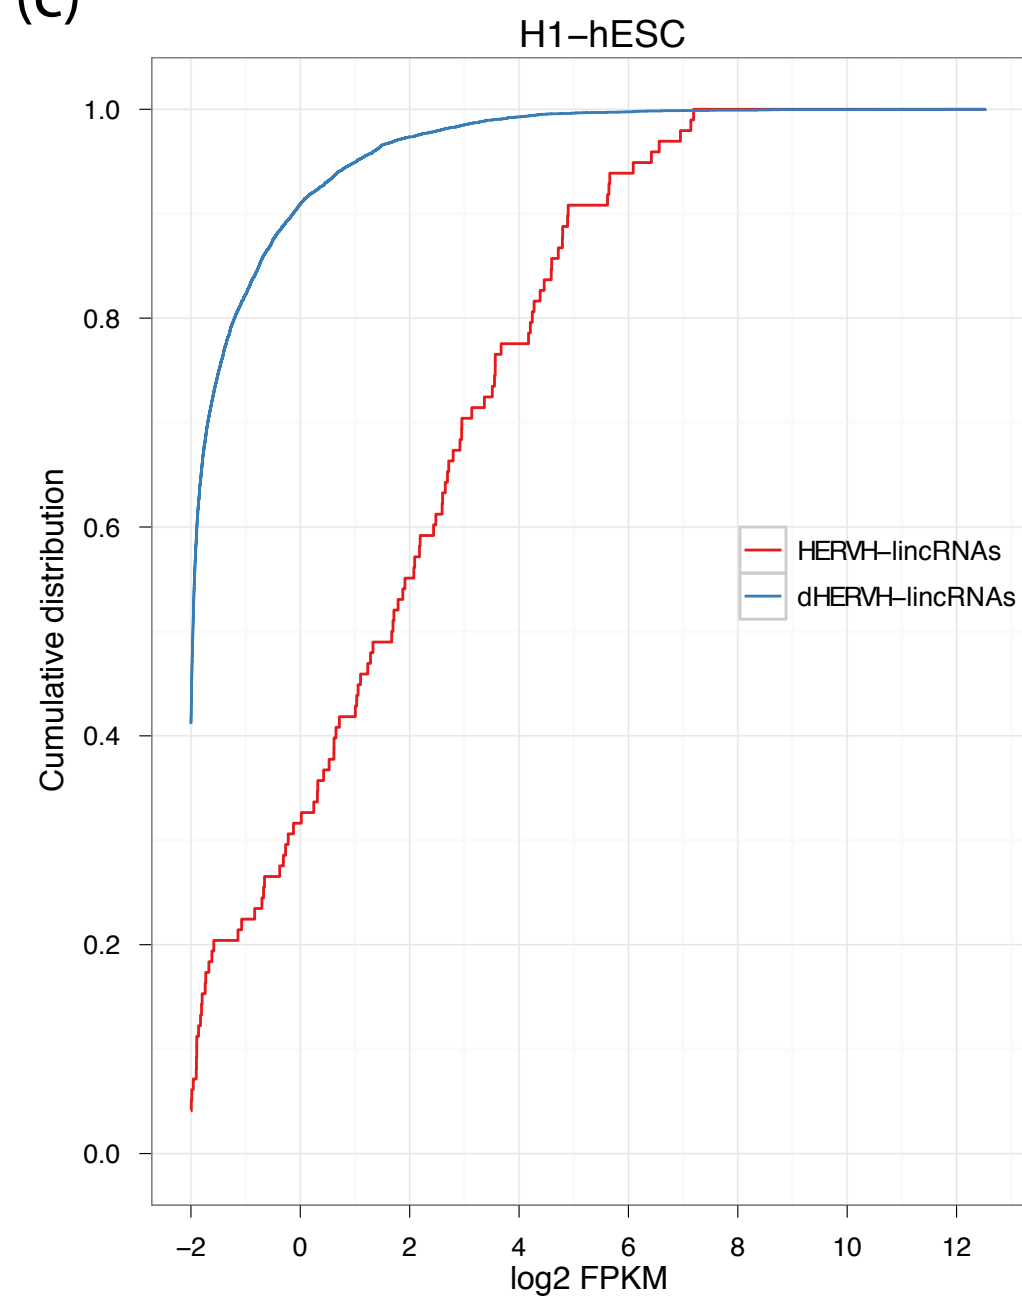

(d)

## H3K4me3 at HERVH-lincRNA TSSs

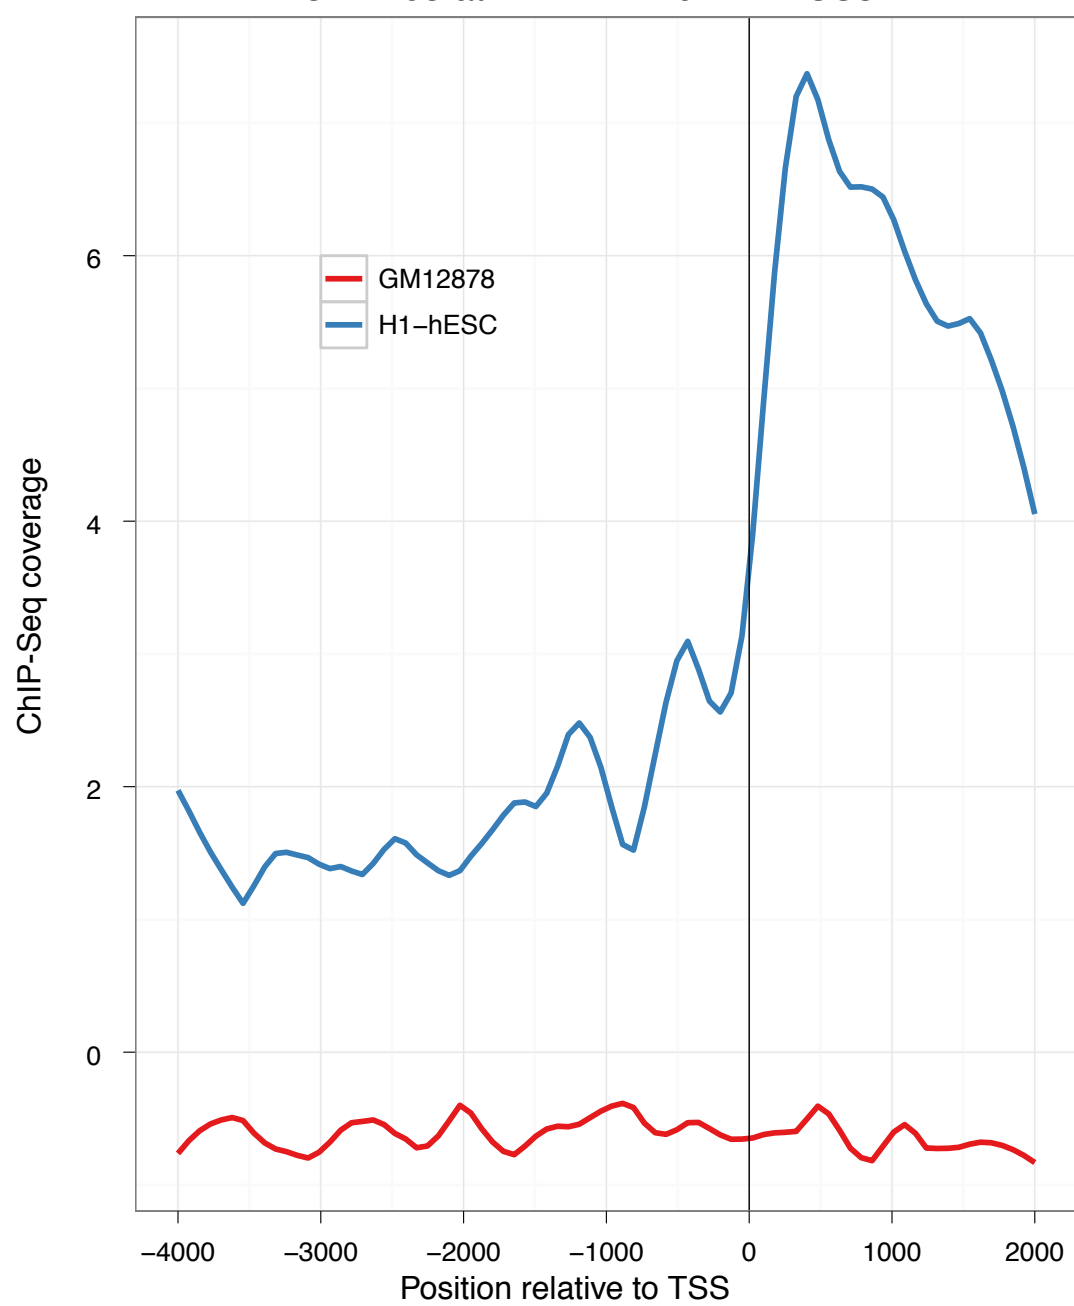

(e)

## SP1 at HERVH-lincRNA TSSs

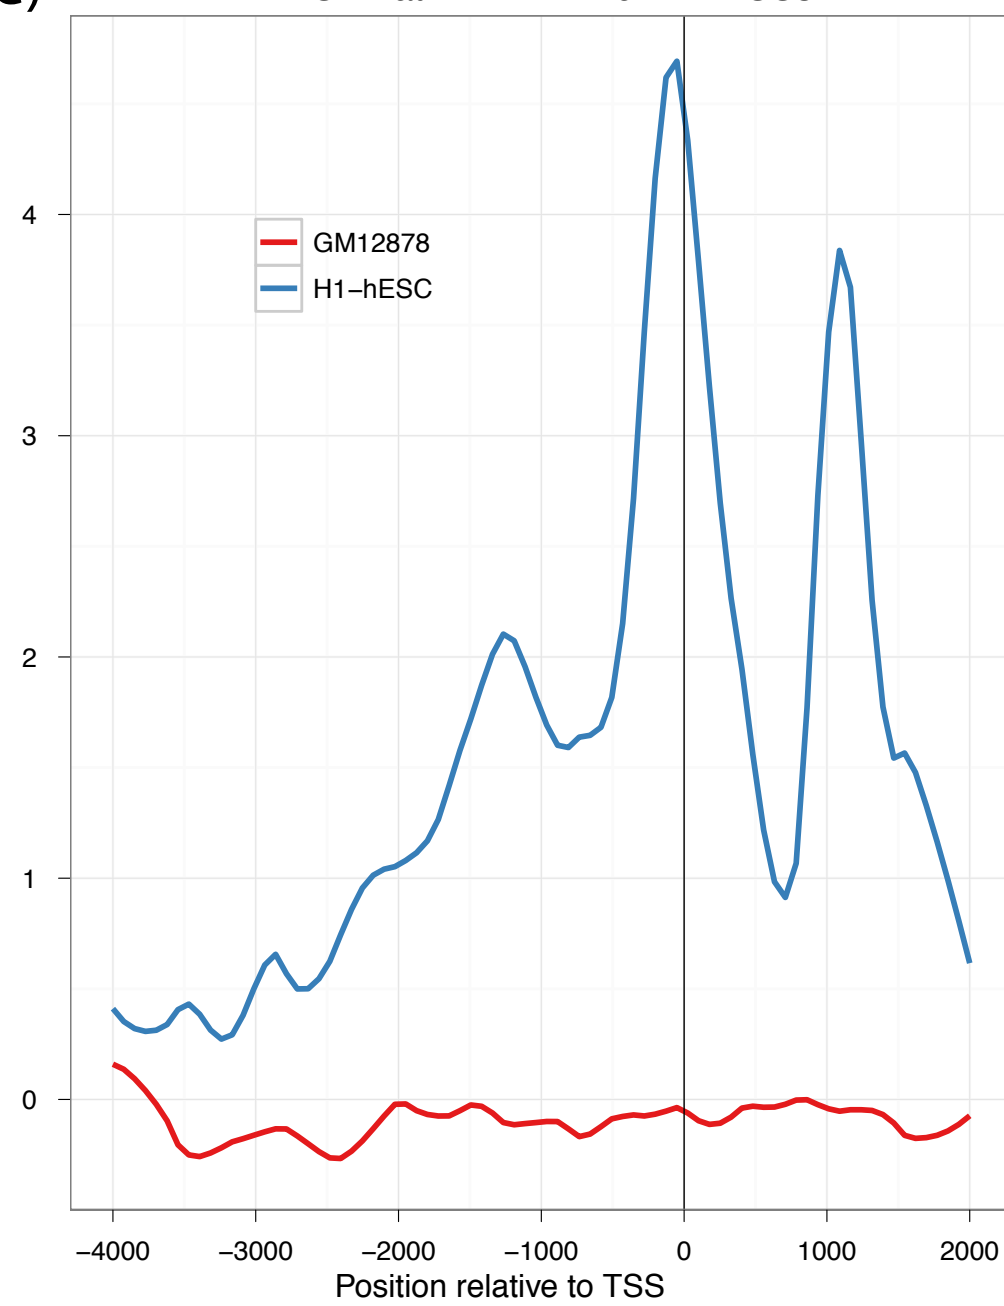

Supplement: 13059_2012_3000_MOESM13_ESM.pdf [file 13059_2012_3000_MOESM13_ESM.pdf]
